# Supplementary material for: Epigenetic Biomarkers of Lead Exposure and Cardiovascular Disease: Prospective Evidence in the Strong Heart Study
Source: PubMed Central journal article supplement — J Am Heart Assoc. 2022 Dec 6;11(23):e026934. doi: 10.1161/JAHA.122.026934 (PMC9851430; doi:10.1161/jaha.122.026934), 2022-12-06
Supplement: JAH3-11-e026934-s001.pdf [file JAH3-11-e026934-s001.pdf]

## **SUPPLEMENTAL MATERIAL**

## **Data S1. Supplemental Methods**

### **Blood lead biomarker results from the Normative Aging Study (NAS)**

An additional analysis was performed in a subset of the Normative Aging Study (N = 348) to examine the association between lead levels in blood with DNA methylation values (Table S1). Similar to the methodological approach for tibia and patella lead<sup>12</sup>, an epigenome-wide robust linear regression was performed that accounted for outliers and heteroskedasticity in DNA methylation beta values. Covariates in the epigenome wide analysis were identified through principle-component analysis (Figure S1). Epigenome-wide analysis indicated no excess of false positive rates (Figure S2). An elastic net approach (Figure S3) was used to identify significant CpG sites ( $p < 0.0001$ ), and 80% of participants were randomly assigned to the training dataset, while 20% were randomly selected for the test dataset. Elastic-net was performed on the training set with leave-one-out cross validation, and lead biomarkers for blood were estimated as the linear combination of regression coefficients and DNA methylation beta-values matrix of the test dataset (Table S2). There were 75 CpG sites associated with blood lead concentrations. Estimated blood lead concentrations were then compared to measured blood lead values in order to validate this biomarker in a subset of the NAS (Figures S4-S5). The Pearson's correlation coefficients between actual and estimated blood lead levels was moderate ( $r = 0.49$ ), and the mean square error (MSE) was 0.40. Results from receiver operating characteristic (ROC) and area under the curve (AUC) indicated good accuracy (AUC: 0.82, 95% CI: 0.73-0.91). The difference in means between the estimated and measured blood lead concentrations were not significantly different ( $p = 0.84$ ), and the Kolmogorov-Smirnov test ( $p = 0.01$ ) indicated that these values likely came from the same distribution.

**Table S1. Description of participants from the Normative Aging Study (NAS)**

| <b>Variables</b>        | <b>mean <math>\pm</math> SD</b> |
|-------------------------|---------------------------------|
| Age (years)             | 76.25 $\pm$ 6.57                |
| Education (years)       | 16 $\pm$ 3.02                   |
| Pack-years              | 33 $\pm$ 25.17                  |
| Smoking Status          |                                 |
| never                   | 156 (0.3)                       |
| ever                    | 360 (0.7)                       |
| Alcohol Consumption     |                                 |
| $\leq$ 2 drinks per day | 417 (0.81)                      |
| $>$ 2 drinks per day    | 99 (0.19)                       |
| Patella lead levels     | 27.36 $\pm$ 17.74               |
| Tibia lead levels       | 21.05 $\pm$ 12.91               |
| Blood lead levels       | 3.96 $\pm$ 2.32                 |

**Table S2. Identification of DNA methylation sites relative to blood lead exposure**

| CpG Name    | Elastic Net Coeff | Chromosome | MAPINFO   | UCSC_RefGene_Name            | UCSC_RefGene_Group              | Relation_to_UCSC_CpG_Island |
|-------------|-------------------|------------|-----------|------------------------------|---------------------------------|-----------------------------|
| (Intercept) | -10.0414          | NA         | NA        | NA                           | NA                              | NA                          |
| cg10442735  | 0.428246          | 1          | 3062633   | PRDM16;PRDM16                | Body;Body                       | S_Shelf                     |
| cg10442251  | -1.20932          | 1          | 18700625  | IGSF21                       | Body                            | N_Shelf                     |
| cg07031996  | -0.39012          | 1          | 38324738  | MTF1                         | 5'UTR                           | N_Shore                     |
| cg17791651  | 0.078059          | 1          | 38513489  | POU3F1                       | TSS1500                         | Island                      |
| cg06408034  | -3.93669          | 1          | 45671987  | ZSWIM5                       | 1stExon                         | Island                      |
| cg16005939  | 0.034461          | 1          | 91191990  |                              |                                 | Island                      |
| cg08122338  | 23.79213          | 1          | 243419530 | CEP170;CEP170;CEP170;SDCCAG8 | TSS1500;TSS1500;TSS1500;1stExon | S_Shore                     |
| cg16596470  | 0.133058          | 1          | 246451744 | SMYD3;SMYD3                  | Body;Body                       |                             |
| cg19407717  | 0.175645          | 2          | 1544120   | TPO;TPO;TPO;TPO              | Body;Body;Body;Body             | N_Shore                     |
| cg12416637  | -0.77252          | 2          | 154333650 |                              |                                 | N_Shore                     |
| cg14844194  | -0.40731          | 2          | 200524259 |                              |                                 | S_Shore                     |
| cg12346504  | -4.03666          | 2          | 214148862 | SPAG16;SPAG16                | TSS1500;TSS1500                 | N_Shore                     |
| cg22753768  | -0.03878          | 3          | 52443424  | BAP1;PHF7;PHF7               | Body;TSS1500;TSS1500            | N_Shore                     |
| cg12226306  | 1.55914           | 3          | 105087718 | ALCAM                        | Body                            | N_Shore                     |

|            |          |   |           |                   |                |         |
|------------|----------|---|-----------|-------------------|----------------|---------|
| cg03552688 | 0.985584 | 3 | 138822369 | BPESC1            | TSS1500        |         |
| cg12958778 | -0.85696 | 4 | 6912474   | TBC1D14;TBC1D14   | 5'UTR;5'UTR    | S_Shore |
| cg01411468 | -0.30947 | 4 | 36283588  | DTHD1;DTHD1       | 5'UTR;1stExon  |         |
| cg11761728 | 0.322849 | 4 | 111536679 |                   |                | N_Shelf |
| cg07799386 | -0.12272 | 5 | 122430821 | PRDM6             | Body           | Island  |
| cg12532966 | 0.453348 | 5 | 178854202 |                   |                |         |
| cg25511429 | 0.092361 | 6 | 6008125   | NRN1              | TSS1500        | N_Shore |
| cg23646360 | -0.56428 | 6 | 10886130  | SYCP2L            | TSS1500        | N_Shore |
| cg17779289 | 12.63892 | 6 | 33272148  | TAPBP;TAPBP;TAPBP | Body;Body;Body |         |
| cg20566286 | -2.04254 | 6 | 168785923 |                   |                |         |
| cg10884288 | 0.18269  | 7 | 4922196   | RADIL             | 5'UTR          | N_Shore |
| cg17469978 | 1.736623 | 7 | 116164704 | CAV1              | TSS200         | Island  |
| cg03917158 | 0.279592 | 8 | 1381012   |                   |                |         |
| cg22883125 | -0.31365 | 8 | 11540758  |                   |                | S_Shore |
| cg01546563 | -0.22378 | 8 | 11567189  | GATA4             | Body           | Island  |
| cg09430976 | 3.464535 | 8 | 25907314  |                   |                | N_Shore |
| cg02504902 | -0.53933 | 8 | 53326922  |                   |                |         |

|            |          |    |           |                         |                     |         |
|------------|----------|----|-----------|-------------------------|---------------------|---------|
| cg17099568 | -0.19174 | 8  | 65284438  |                         |                     | N_Shore |
| cg20413392 | -0.38521 | 9  | 131155013 | MIR219-2                | TSS200              | Island  |
| cg01240049 | 0.597319 | 9  | 138068091 |                         |                     | Island  |
| cg20395881 | 0.396681 | 10 | 1759215   | ADARB2                  | Body                |         |
| cg05453333 | -0.64092 | 10 | 49731375  | ARHGAP22                | Body                | N_Shore |
| cg19880462 | 0.219686 | 10 | 61468548  | SLC16A9                 | 5'UTR               | N_Shore |
| cg24591300 | -0.41475 | 10 | 100993025 | HPSE2;HPSE2;HPSE2;HPSE2 | Body;Body;Body;Body | N_Shore |
| cg22391400 | -12.7911 | 10 | 105727767 | SLK                     | Body                | S_Shore |
| cg20639805 | 0.816579 | 10 | 112404997 | RBM20                   | Body                | S_Shore |
| cg22773555 | 5.800023 | 11 | 830233    | EFCAB4A                 | Body                | Island  |
| cg03922337 | -0.21862 | 11 | 14380918  | RRAS2;RRAS2             | TSS200;TSS1500      | S_Shore |
| cg09867084 | -3.20354 | 11 | 63912367  | MACROD1                 | Body                |         |
| cg14235783 | -1.53413 | 11 | 65420518  |                         |                     | Island  |
| cg04800788 | 2.362246 | 11 | 123396571 | GRAMD1B;GRAMD1B         | 1stExon;5'UTR       |         |
| cg22063247 | -0.37862 | 11 | 133994642 | JAM3                    | Body                | N_Shore |
| cg14121142 | -1.12071 | 12 | 49391363  | DDN                     | Body                | Island  |
| cg09287190 | -0.17873 | 13 | 100640914 |                         |                     | N_Shore |

|                |          |    |               |                 |                 |         |
|----------------|----------|----|---------------|-----------------|-----------------|---------|
| cg2467055<br>2 | -0.03639 | 13 | 11043678<br>0 | IRS2            | 1stExon         | Island  |
| cg1685142<br>5 | 0.606277 | 13 | 11043775<br>9 | IRS2            | 1stExon         | Island  |
| cg0439347<br>1 | -0.37513 | 13 | 11101025<br>5 | COL4A2          | Body            |         |
| cg2605397<br>5 | 1.858657 | 14 | 54973785      |                 |                 | N_Shelf |
| cg0929801<br>4 | -0.40781 | 14 | 97058864      |                 |                 | N_Shore |
| cg2647161<br>0 | 0.968717 | 15 | 34640893      | C15orf55        | Body            |         |
| cg2495653<br>3 | -0.45115 | 15 | 37173638      | LOC145845       | Body            | S_Shore |
| cg0360338<br>1 | 0.106808 | 15 | 38857474      | RASGRP1;RASGRP1 | TSS1500;TSS1500 | Island  |
| cg1786511<br>4 | -0.65723 | 16 | 3067759       | CLDN6           | 5'UTR           | Island  |
| cg0998103<br>0 | -3.41555 | 16 | 3179796       |                 |                 |         |
| cg1663108<br>8 | -0.46834 | 16 | 15528133      | C16orf45        | TSS200          | N_Shore |
| cg1013783<br>7 | 0.063332 | 17 | 6926742       | BCL6B           | 5'UTR           | Island  |
| cg2196979<br>5 | -0.20118 | 17 | 7759140       | TMEM88          | 3'UTR           | N_Shore |
| cg0641890<br>7 | -0.30942 | 17 | 7982510       | ALOX12B         | Body            | N_Shore |
| cg1371896<br>1 | -0.00948 | 17 | 27939261      | ANKRD13B        | Body            | N_Shore |
| cg0547882<br>4 | -0.10059 | 17 | 79970135      | ASPSCR1         | Body            | S_Shelf |
| cg2392851<br>2 | -0.19177 | 17 | 79970192      | ASPSCR1         | Body            | S_Shelf |

|            |          |    |          |           |               |         |
|------------|----------|----|----------|-----------|---------------|---------|
| cg27226927 | -0.09136 | 17 | 79993863 | DCXR      | Body          | N_Shore |
| cg13214542 | -0.94023 | 18 | 33552019 | C18orf21  | TSS1500       | N_Shore |
| cg26901714 | 1.01678  | 19 | 376152   | THEG;THEG | TSS200;TSS200 | S_Shore |
| cg19399220 | -0.30309 | 19 | 10527588 |           |               | Island  |
| cg01397939 | -0.31035 | 19 | 14583568 | PTGER1    | Body          | Island  |
| cg11571942 | -0.68779 | 19 | 55610938 | PPP1R12C  | Body          | S_Shore |
| cg12014753 | -0.32942 | 20 | 50384822 | ATP9A     | Body          | Island  |
| cg24875593 | -0.12506 | 21 | 45153009 | PDXK      | Body          | S_Shelf |
| cg06911679 | 0.764272 | 22 | 22877746 |           |               |         |
| cg03938598 | -1.51491 | 22 | 50699868 | MAPK12    | 1stExon       | Island  |



**Table S3. Average beta values for each probe used in the Strong Heart Study analysis according to men and women**

| <b>CpG_Name</b> | <b>Mean Beta Values Males</b> | <b>Mean Beta values Females</b> | <b>p-value</b> |
|-----------------|-------------------------------|---------------------------------|----------------|
| cg00056541      | 0.58496843                    | 0.582887355                     | 0.7659865      |
| cg00118365      | 0.42868554                    | 0.418396093                     | 0.007774756    |
| cg00178249      | 0.20722654                    | 0.210491875                     | 0.2397211      |
| cg00284153      | 0.6291812                     | 0.645383531                     | 8.45281E-08    |
| cg00295339      | 0.94771763                    | 0.94751594                      | 0.7659865      |
| cg00380835      | 0.74041844                    | 0.779700844                     | 3.6853E-48     |
| cg00549219      | 0.4402119                     | 0.444518224                     | 0.2673082      |
| cg00616922      | 0.95090747                    | 0.951576707                     | 0.1768622      |
| cg00668034      | 0.22873846                    | 0.239005099                     | 0.05562816     |
| cg00697358      | 0.84656619                    | 0.849918297                     | 0.1747424      |
| cg00779216      | 0.75719151                    | 0.759914162                     | 0.2300414      |
| cg00788177      | 0.12906659                    | 0.134293886                     | 0.1870585      |
| cg00815440      | 0.01045778                    | 0.01044907                      | 0.9305097      |
| cg00845862      | 0.02946731                    | 0.029652953                     | 0.5630539      |
| cg00846121      | 0.86361652                    | 0.865733048                     | 0.2228284      |
| cg00964109      | 0.01183793                    | 0.011724312                     | 0.4473895      |
| cg01154573      | 0.01352264                    | 0.013559338                     | 0.7659865      |
| cg01198591      | 0.04118068                    | 0.04318176                      | 0.1551233      |
| cg01240049      | 0.88363526                    | 0.888104586                     | 0.01057448     |
| cg01283863      | 0.95507173                    | 0.955521172                     | 0.4072994      |
| cg01330312      | 0.77391814                    | 0.774935805                     | 0.7440688      |
| cg01397939      | 0.38810596                    | 0.396766654                     | 0.00011298     |
| cg01411468      | 0.92257617                    | 0.933420123                     | 1.26968E-12    |
| cg01502872      | 0.26467011                    | 0.264038505                     | 0.811521       |
| cg01546563      | 0.1292038                     | 0.125979448                     | 0.1434667      |
| cg01815833      | 0.0254163                     | 0.025306478                     | 0.8024407      |
| cg02012703      | 0.11240353                    | 0.112911434                     | 0.8023217      |
| cg02021288      | 0.8237959                     | 0.820060127                     | 0.1534882      |

|            |            |             |             |
|------------|------------|-------------|-------------|
| cg02033302 | 0.71107632 | 0.717584688 | 0.006621538 |
| cg02440976 | 0.01595504 | 0.016007914 | 0.6585425   |
| cg02493604 | 0.07910375 | 0.079218722 | 0.9517672   |
| cg02504902 | 0.86003648 | 0.875486897 | 7.55121E-13 |
| cg02613380 | 0.94954078 | 0.952041939 | 1.57038E-05 |
| cg02631879 | 0.01528417 | 0.015650696 | 0.4563141   |
| cg02806322 | 0.75089225 | 0.760056177 | 1.31511E-05 |
| cg02830714 | 0.94905328 | 0.949217764 | 0.8320486   |
| cg03206925 | 0.95450323 | 0.956274081 | 0.006776076 |
| cg03318593 | 0.94517853 | 0.945546979 | 0.7659865   |
| cg03454705 | 0.94211574 | 0.941637977 | 0.2289362   |
| cg03523835 | 0.17066817 | 0.174034979 | 0.1747424   |
| cg03552688 | 0.95985134 | 0.962409335 | 2.09537E-05 |
| cg03591798 | 0.03447532 | 0.034326159 | 0.7952533   |
| cg03603381 | 0.55829467 | 0.571340473 | 5.20594E-11 |
| cg03612522 | 0.02987886 | 0.029775071 | 0.8469719   |
| cg03764965 | 0.84014945 | 0.847386484 | 0.004543919 |
| cg03791150 | 0.92590865 | 0.931427581 | 4.13411E-10 |
| cg03897712 | 0.02738225 | 0.028314977 | 0.001660234 |
| cg03917158 | 0.85410775 | 0.854560929 | 0.8291399   |
| cg03922337 | 0.15495776 | 0.163709336 | 1.6947E-16  |
| cg03938598 | 0.02645677 | 0.026315627 | 0.8024407   |
| cg04276508 | 0.07283903 | 0.074651596 | 0.1932282   |
| cg04300684 | 0.53469052 | 0.505786098 | 7.08008E-08 |
| cg04338871 | 0.6741962  | 0.683706213 | 0.002612561 |
| cg04379155 | 0.01805047 | 0.017804687 | 0.3354398   |
| cg04393471 | 0.94511639 | 0.945218367 | 0.9305097   |
| cg04427735 | 0.00864506 | 0.008458977 | 0.1100234   |
| cg04456892 | 0.91369662 | 0.912503997 | 0.4936289   |
| cg04458670 | 0.02299539 | 0.025273104 | 5.89511E-05 |
| cg04730882 | 0.35418876 | 0.359704605 | 0.003470847 |

|            |            |             |             |
|------------|------------|-------------|-------------|
| cg04800788 | 0.92392269 | 0.928567365 | 5.29813E-08 |
| cg04804542 | 0.86811638 | 0.872293814 | 0.04984412  |
| cg04827747 | 0.0120057  | 0.012142951 | 0.06104231  |
| cg04929736 | 0.02632464 | 0.026226671 | 0.805865    |
| cg05005659 | 0.94775253 | 0.951312908 | 0.000210125 |
| cg05347216 | 0.61562419 | 0.607575812 | 0.000496259 |
| cg05453333 | 0.31287689 | 0.310320094 | 0.4473895   |
| cg05459971 | 0.35325474 | 0.372120463 | 2.5017E-06  |
| cg05478824 | 0.62652694 | 0.625713873 | 0.837371    |
| cg05499853 | 0.01782655 | 0.017866197 | 0.8214504   |
| cg06100461 | 0.06666467 | 0.066981879 | 0.8024407   |
| cg06155303 | 0.29759262 | 0.334689604 | 2.37168E-18 |
| cg06376277 | 0.88733509 | 0.892669751 | 0.000400618 |
| cg06382254 | 0.94982495 | 0.953266852 | 0.000006456 |
| cg06408034 | 0.02705669 | 0.026694588 | 0.4473587   |
| cg06418907 | 0.38295105 | 0.384082316 | 0.8024407   |
| cg06436673 | 0.96246947 | 0.964520213 | 0.1363552   |
| cg06773604 | 0.02771975 | 0.029220305 | 0.000217691 |
| cg06890950 | 0.76827007 | 0.769505077 | 0.7783067   |
| cg06911679 | 0.923253   | 0.926617845 | 0.0006456   |
| cg07015663 | 0.84660682 | 0.848419866 | 0.2477632   |
| cg07031996 | 0.1455926  | 0.14512796  | 0.8300571   |
| cg07105947 | 0.13450664 | 0.147806192 | 0.000108698 |
| cg07122529 | 0.72713874 | 0.731313517 | 0.2300414   |
| cg07361385 | 0.96913929 | 0.970529982 | 5.89511E-05 |
| cg07513561 | 0.96262694 | 0.963626463 | 0.007907952 |
| cg07545743 | 0.30837788 | 0.320011077 | 0.02597441  |
| cg07764113 | 0.84288543 | 0.840901313 | 0.5121869   |
| cg07799386 | 0.09218271 | 0.094209988 | 0.1741885   |
| cg07846297 | 0.14843267 | 0.150739046 | 0.12105     |
| cg08069883 | 0.8084274  | 0.815907877 | 0.000402556 |

|            |            |             |             |
|------------|------------|-------------|-------------|
| cg08122338 | 0.02539538 | 0.025325591 | 0.8811339   |
| cg08220084 | 0.03895264 | 0.040035359 | 0.1845172   |
| cg08421126 | 0.25305366 | 0.255224475 | 0.2585871   |
| cg08570458 | 0.95446321 | 0.95664953  | 0.000235253 |
| cg08615567 | 0.08744007 | 0.091646716 | 0.006008831 |
| cg08693172 | 0.14543769 | 0.147709499 | 0.4473895   |
| cg08790487 | 0.91713536 | 0.919099112 | 0.1119232   |
| cg09062550 | 0.11324341 | 0.113864512 | 0.8024407   |
| cg09135656 | 0.76687302 | 0.762111709 | 0.3354398   |
| cg09178385 | 0.82794409 | 0.836735747 | 3.15403E-05 |
| cg09264065 | 0.48855514 | 0.52139771  | 6.994E-23   |
| cg09284949 | 0.22763095 | 0.19635569  | 1.27103E-16 |
| cg09287190 | 0.41326462 | 0.416510742 | 0.24748     |
| cg09298014 | 0.06879225 | 0.077160597 | 1.27711E-08 |
| cg09430976 | 0.02326638 | 0.023384074 | 0.8214504   |
| cg09436495 | 0.79545639 | 0.798029022 | 0.2603782   |
| cg09463656 | 0.06354496 | 0.063660055 | 0.9326718   |
| cg09741221 | 0.04794629 | 0.048743499 | 0.2857081   |
| cg09867084 | 0.90759998 | 0.910090956 | 0.005631067 |
| cg09981030 | 0.02118936 | 0.02118163  | 0.9863333   |
| cg10042319 | 0.02970335 | 0.031895207 | 2.152E-07   |
| cg10086141 | 0.02469616 | 0.024244482 | 0.2476225   |
| cg10137837 | 0.32732382 | 0.338338996 | 5.68263E-08 |
| cg10197862 | 0.01962838 | 0.019735399 | 0.4065568   |
| cg10442251 | 0.52114124 | 0.535732908 | 7.12466E-06 |
| cg10442735 | 0.89969056 | 0.902355832 | 0.1183124   |
| cg10521014 | 0.53174386 | 0.533214412 | 0.7915947   |
| cg10716862 | 0.90709192 | 0.908609051 | 0.53531     |
| cg10845249 | 0.12378774 | 0.126648879 | 0.2300414   |
| cg10884288 | 0.04859265 | 0.050792374 | 0.00160119  |
| cg11352369 | 0.91263601 | 0.914790372 | 0.04890909  |

|            |            |             |             |
|------------|------------|-------------|-------------|
| cg11571942 | 0.89022465 | 0.891443684 | 0.2567727   |
| cg11728928 | 0.29951645 | 0.303285247 | 0.4434066   |
| cg11753765 | 0.0274747  | 0.029409776 | 8.12604E-05 |
| cg11761728 | 0.32048304 | 0.325056358 | 0.01069886  |
| cg11888571 | 0.01762917 | 0.017541554 | 0.8193292   |
| cg11990334 | 0.0733973  | 0.075752209 | 0.2399189   |
| cg12063795 | 0.24392602 | 0.243865421 | 0.9826113   |
| cg12153668 | 0.81991514 | 0.830428023 | 3.14394E-06 |
| cg12226306 | 0.14751235 | 0.14949392  | 0.2289362   |
| cg12346504 | 0.01551764 | 0.01568627  | 0.6181827   |
| cg12416637 | 0.04044338 | 0.039561378 | 0.2289362   |
| cg12532966 | 0.84560692 | 0.850668008 | 0.03147872  |
| cg12841525 | 0.8517187  | 0.85660277  | 0.047075    |
| cg12858300 | 0.0163708  | 0.016530306 | 0.329689    |
| cg12903529 | 0.85671824 | 0.866156656 | 4.88683E-05 |
| cg12920180 | 0.09328164 | 0.095989235 | 0.2289362   |
| cg12958778 | 0.7257577  | 0.734699749 | 0.000178471 |
| cg13214542 | 0.09717336 | 0.097668665 | 0.8024407   |
| cg13251292 | 0.87232593 | 0.875138183 | 0.2566928   |
| cg13257129 | 0.86239076 | 0.868595301 | 0.008351512 |
| cg13415073 | 0.10183125 | 0.107537822 | 0.003673877 |
| cg13446622 | 0.91100134 | 0.915060704 | 0.00267394  |
| cg13448092 | 0.59668003 | 0.590516236 | 0.2300414   |
| cg13463245 | 0.81078363 | 0.807887931 | 0.3623588   |
| cg13580008 | 0.02582386 | 0.025374774 | 0.2231704   |
| cg13718961 | 0.90134212 | 0.909583663 | 8.4466E-22  |
| cg13807056 | 0.89878117 | 0.90485048  | 0.001336323 |
| cg14074486 | 0.69496203 | 0.705761845 | 2.56941E-07 |
| cg14121142 | 0.04100012 | 0.04490217  | 0.008351512 |
| cg14133708 | 0.04817508 | 0.048690267 | 0.7388203   |
| cg14235783 | 0.03490175 | 0.034300926 | 0.2673082   |

|            |            |             |             |
|------------|------------|-------------|-------------|
| cg14312661 | 0.94709223 | 0.94740029  | 0.751726    |
| cg14727952 | 0.02366804 | 0.02361159  | 0.8811339   |
| cg14762973 | 0.06256058 | 0.063904141 | 0.5035128   |
| cg14821507 | 0.02071654 | 0.020803245 | 0.6926121   |
| cg14844194 | 0.1527787  | 0.158403321 | 0.02327435  |
| cg14923295 | 0.01548794 | 0.015543837 | 0.6832347   |
| cg15081825 | 0.76421339 | 0.768065598 | 0.4710984   |
| cg15349474 | 0.94768242 | 0.948792569 | 0.04721224  |
| cg15364504 | 0.84316391 | 0.850931172 | 0.002143723 |
| cg15739944 | 0.02172167 | 0.021367435 | 0.5163719   |
| cg15825186 | 0.0216944  | 0.021919112 | 0.7185787   |
| cg15996769 | 0.32133988 | 0.337130398 | 2.97636E-06 |
| cg16005939 | 0.18548533 | 0.190787977 | 0.01121337  |
| cg16218705 | 0.88664416 | 0.890462077 | 0.3649591   |
| cg16520800 | 0.02074738 | 0.021019908 | 0.2397211   |
| cg16596470 | 0.97268657 | 0.972950518 | 0.341485    |
| cg16619425 | 0.05512619 | 0.059504217 | 5.79247E-05 |
| cg16631088 | 0.82325635 | 0.841250428 | 4.94288E-12 |
| cg16851425 | 0.1020518  | 0.102712251 | 0.7867655   |
| cg16937735 | 0.60400759 | 0.620827609 | 2.73483E-10 |
| cg16944026 | 0.95926577 | 0.959454336 | 0.7783067   |
| cg16961545 | 0.02480515 | 0.024711424 | 0.862952    |
| cg16978871 | 0.01349794 | 0.013510411 | 0.9451073   |
| cg17099568 | 0.14696479 | 0.151779387 | 0.048958    |
| cg17331296 | 0.07388515 | 0.072352709 | 0.538       |
| cg17469978 | 0.04744632 | 0.045549368 | 0.007229375 |
| cg17531889 | 0.93830515 | 0.939070663 | 0.3858229   |
| cg17584477 | 0.95487962 | 0.955672452 | 0.2604331   |
| cg17779289 | 0.966167   | 0.966380222 | 0.5847826   |
| cg17791651 | 0.57487655 | 0.595586109 | 1.6409E-15  |
| cg17825384 | 0.02365016 | 0.023782885 | 0.6532857   |

|            |            |             |             |
|------------|------------|-------------|-------------|
| cg17865114 | 0.95143862 | 0.953281848 | 0.000057835 |
| cg17884698 | 0.95781925 | 0.958107423 | 0.5512512   |
| cg17886028 | 0.01777533 | 0.017791895 | 0.9451073   |
| cg18086761 | 0.06642791 | 0.068131302 | 0.4473895   |
| cg18207091 | 0.02494037 | 0.025356759 | 0.5745631   |
| cg18598900 | 0.07088687 | 0.072099249 | 0.5050612   |
| cg18605120 | 0.93271021 | 0.932714301 | 0.997       |
| cg18766080 | 0.02251333 | 0.022392814 | 0.7952533   |
| cg18916055 | 0.87493137 | 0.874835272 | 0.9696274   |
| cg19246761 | 0.08484054 | 0.082469422 | 0.175704    |
| cg19399220 | 0.28103753 | 0.265107892 | 1.32507E-07 |
| cg19407717 | 0.8723388  | 0.877941395 | 0.00060639  |
| cg19531536 | 0.45638608 | 0.48506147  | 8.9039E-37  |
| cg19615017 | 0.66761604 | 0.670326365 | 0.6512632   |
| cg19880462 | 0.11121461 | 0.108836595 | 0.2289362   |
| cg20100987 | 0.73623035 | 0.747374251 | 5.95939E-14 |
| cg20326704 | 0.06693369 | 0.080600025 | 2.70537E-18 |
| cg20395881 | 0.64511559 | 0.653942524 | 0.04714433  |
| cg20413392 | 0.85533839 | 0.852730889 | 0.4186124   |
| cg20506843 | 0.53583564 | 0.542926044 | 0.329689    |
| cg20566286 | 0.92798539 | 0.928975282 | 0.2437248   |
| cg20606555 | 0.76190802 | 0.764352055 | 0.538       |
| cg20639805 | 0.32798408 | 0.372460976 | 3.29077E-31 |
| cg20844771 | 0.01543032 | 0.015102398 | 0.1440746   |
| cg20922251 | 0.03211064 | 0.032654739 | 0.01303615  |
| cg21244880 | 0.01571983 | 0.0158056   | 0.5065939   |
| cg21365094 | 0.04850061 | 0.046962078 | 0.2103459   |
| cg21371809 | 0.26956099 | 0.265685871 | 0.4473895   |
| cg21531679 | 0.94099427 | 0.94298578  | 0.1605107   |
| cg21558508 | 0.01339452 | 0.013466776 | 0.4453934   |
| cg21587066 | 0.09330338 | 0.092772035 | 0.8300571   |

|            |            |             |             |
|------------|------------|-------------|-------------|
| cg21616420 | 0.95669641 | 0.958222857 | 0.01282233  |
| cg21969795 | 0.74956769 | 0.757652125 | 0.002899662 |
| cg21994822 | 0.66081969 | 0.655212663 | 0.1274826   |
| cg21996068 | 0.54517711 | 0.556029723 | 0.003326507 |
| cg22063247 | 0.37974464 | 0.371364492 | 0.003243371 |
| cg22391400 | 0.011535   | 0.011303061 | 0.1085872   |
| cg22691824 | 0.7133124  | 0.720137557 | 0.00298629  |
| cg22753768 | 0.16210773 | 0.161696145 | 0.8755896   |
| cg22773555 | 0.01821075 | 0.017697478 | 0.329689    |
| cg22784964 | 0.01311743 | 0.013208519 | 0.3769128   |
| cg22883125 | 0.02760152 | 0.02767862  | 0.8320486   |
| cg22908581 | 0.42664251 | 0.426491765 | 0.975125    |
| cg23028436 | 0.06785963 | 0.069812587 | 0.04984412  |
| cg23087931 | 0.96034556 | 0.960969909 | 0.2235074   |
| cg23483656 | 0.10846348 | 0.109980304 | 0.4434066   |
| cg23497569 | 0.94859057 | 0.950157554 | 0.2058258   |
| cg23528492 | 0.77355495 | 0.774005914 | 0.9240941   |
| cg23646360 | 0.2809995  | 0.297255569 | 2.73828E-05 |
| cg23832388 | 0.64937939 | 0.652115089 | 0.5745631   |
| cg23928512 | 0.85352002 | 0.853044957 | 0.8193292   |
| cg23931558 | 0.10526118 | 0.109975864 | 0.08198095  |
| cg24036116 | 0.81175374 | 0.821037861 | 4.02844E-05 |
| cg24362016 | 0.57194556 | 0.588801689 | 5.51137E-05 |
| cg24526433 | 0.01472322 | 0.014601141 | 0.3818563   |
| cg24591300 | 0.45479133 | 0.472695179 | 2.15424E-15 |
| cg24612305 | 0.02026427 | 0.021223631 | 0.04077474  |
| cg24670552 | 0.88373103 | 0.889265878 | 0.006008831 |
| cg24731731 | 0.58343984 | 0.611364315 | 7.8279E-09  |
| cg24792682 | 0.05809228 | 0.058568899 | 0.7031535   |
| cg24875593 | 0.84606152 | 0.837244819 | 0.2841313   |
| cg24915508 | 0.94497843 | 0.946390852 | 0.1857977   |



|            |            |             |             |
|------------|------------|-------------|-------------|
| cg24956533 | 0.07698776 | 0.077341201 | 0.8811339   |
| cg24958687 | 0.31670006 | 0.30776088  | 0.1100234   |
| cg25055120 | 0.94731815 | 0.94354373  | 0.001142148 |
| cg25511429 | 0.0931265  | 0.092088066 | 0.4637448   |
| cg25566285 | 0.95055679 | 0.952678922 | 0.09578411  |
| cg25774020 | 0.92609292 | 0.931161217 | 0.1001278   |
| cg25884854 | 0.01495966 | 0.014253054 | 0.000113402 |
| cg25926515 | 0.36105646 | 0.384927735 | 8.0969E-16  |
| cg25987408 | 0.82365331 | 0.833793407 | 1.68736E-08 |
| cg25994470 | 0.01603081 | 0.016155502 | 0.3485858   |
| cg26053975 | 0.93120769 | 0.933078806 | 0.008351512 |
| cg26070426 | 0.23242671 | 0.229498579 | 0.4434066   |
| cg26234034 | 0.01852287 | 0.018515323 | 0.984985    |
| cg26471610 | 0.94765203 | 0.949957743 | 7.12466E-06 |
| cg26607429 | 0.95421099 | 0.955775788 | 0.1747424   |
| cg26901714 | 0.86566625 | 0.86992686  | 0.007306173 |
| cg26937798 | 0.01846308 | 0.017875041 | 0.08780566  |
| cg26955337 | 0.98254318 | 0.982459595 | 0.3818563   |
| cg27111925 | 0.35220067 | 0.355807776 | 0.344256    |
| cg27226927 | 0.78542235 | 0.786589855 | 0.656564    |
| cg27425146 | 0.96754543 | 0.967870615 | 0.4473895   |
| cg27532331 | 0.96654603 | 0.966543031 | 0.9946978   |
| cg27585878 | 0.9619612  | 0.962014053 | 0.9326718   |
| cg27622405 | 0.01253221 | 0.012636875 | 0.4207821   |

Bonferroni corrected p-values are reported.

**Table S4. Hazard ratios (95% confidence interval) for cardiovascular disease mortality and cardiovascular disease incidence by lead epigenetic biomarkers after adjustment for urinary cadmium (N = 2,321)**

*CVD Mortality*

| <b>Epigenetic biomarker</b> | Tertile 1        | Tertile 2          | Tertile 3                 | Per double increase       |
|-----------------------------|------------------|--------------------|---------------------------|---------------------------|
| <b>eTibia lead</b>          | < 3.6 µg/g       | 3.6 - 3.9 µg/g     | > 3.9 µg/g                |                           |
|                             | 1.00 (Reference) | 1.18 (0.94 - 1.49) | 1.19 (0.94 - 1.52)        | <b>1.42 (1.08- 1.88)</b>  |
| <b>ePatella lead</b>        | < 4.3 µg/g       | 4.3 - 4.5 µg/g     | > 4.5 µg/g                |                           |
|                             | 1.00 (Reference) | 0.98 (0.77 - 1.23) | 1.12 (0.88 - 1.43)        | 1.22 (0.93 - 1.59)        |
| <b>eBlood lead</b>          | < 1.4 µg/dL      | 1.4 - 1.7 µg/dL    | > 1.7 µg/dL               |                           |
|                             | 1.00 (Reference) | 1.17 (0.93 - 1.48) | <b>1.28 (1.00 – 1.64)</b> | <b>1.56 (1.16 - 2.11)</b> |

*CVD Incidence*

| <b>Epigenetic biomarker</b> | Tertile 1        | Tertile 2          | Tertile 3          | Per double increase |
|-----------------------------|------------------|--------------------|--------------------|---------------------|
| <b>eTibia lead</b>          | < 3.6 µg/g       | 3.6 - 3.9 µg/g     | > 3.9 µg/g         |                     |
|                             | 1.00 (Reference) | 0.96 (0.83 - 1.12) | 1.03 (0.88 - 1.21) | 0.99 (0.83 - 1.19)  |
| <b>ePatella lead</b>        | < 4.3 µg/g       | 4.3 - 4.5 µg/g     | > 4.5 µg/g         |                     |
|                             | 1.00 (Reference) | 0.89 (0.77 - 1.05) | 1.03 (0.88 - 1.21) | 1.07 (0.89 - 1.28)  |
| <b>eBlood lead</b>          | < 1.4 µg/dL      | 1.4 - 1.7 µg/dL    | > 1.7 µg/dL        |                     |
|                             | 1.00 (Reference) | 1.07 (0.92 - 1.25) | 1.00 (0.85 – 1.18) | 1.06 (0.87 – 1.30)  |

All models adjusted for sex, smoking status (never, former, current), BMI (kg/m<sup>2</sup>), genetic PC's, immune cell types (CD8+, CD4+, NK, B cells, monocytes), LDL-cholesterol (mg/dL) HDL-cholesterol (mg/dL), diabetes status (yes/no), blood pressure (mmHg),

hypertension treatment (yes/no), and estimated glomerular filtration rate (ml/min/1.73m<sup>2</sup>) and urinary cadmium (expressed in micrograms per gram of urine creatinine). All models included center of recruitment as a strata term, and age was accounted for in the follow-up times of all models. Tertiles were calculated on log<sub>2</sub>-transformed lead epigenetic biomarker concentrations.



**Figure S2. Quantile-Quantile plot and genomic inflation factor (lambda) for the Epigenome-Wide Association Analysis.**

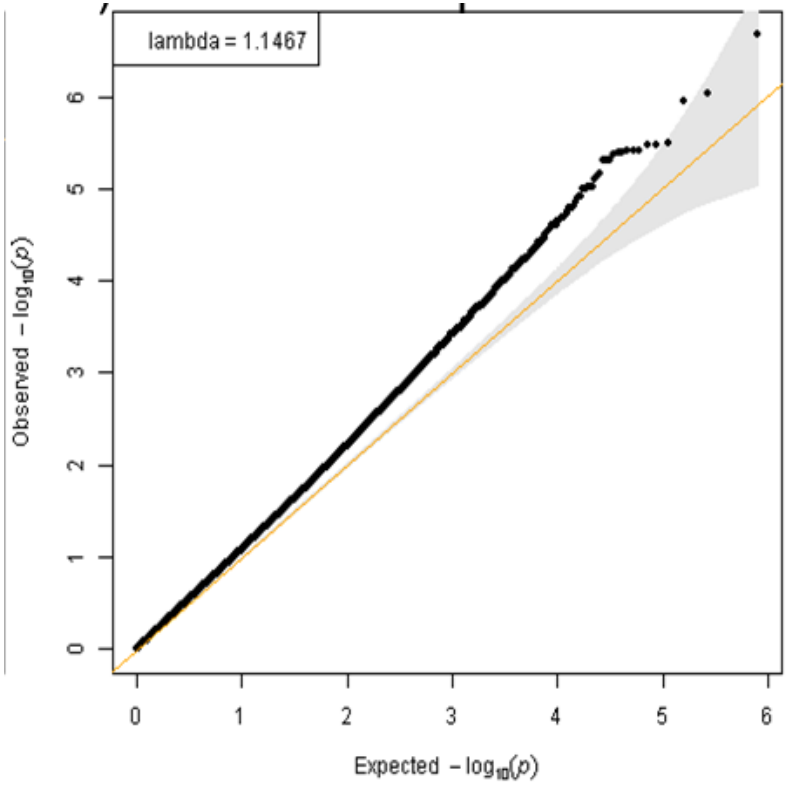

**Figure S3. Alpha parameter selection (left) and Lambda parameter selection (right) of the elastic-net algorithm for methylation lead biomarkers in blood.**

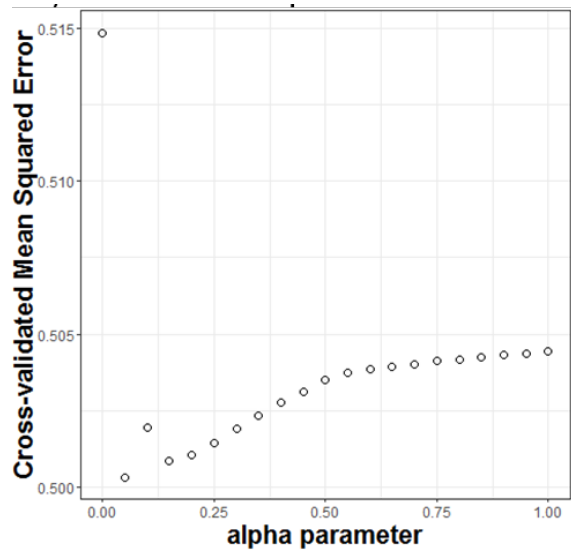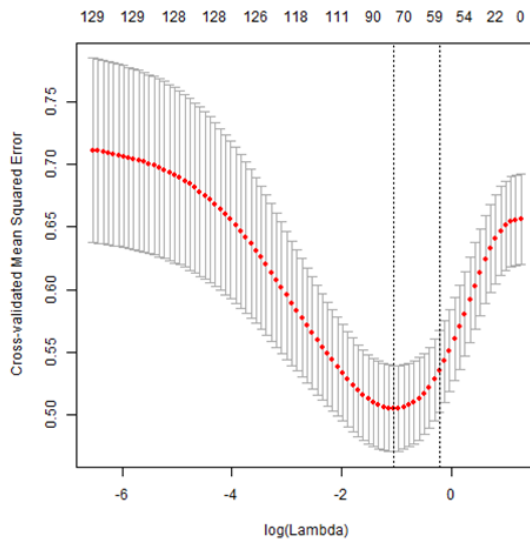

**Figure S4. Relationship between actual and predicted (log<sub>2</sub>-transformed) lead levels in whole blood (left), *Receiver Operating Characteristic*, and Area Under the Curve (AUC) with 95% Confidence Interval (95% CI) (middle), and box-plots and P-value for statistical difference between the means of actual and predicted (log<sub>2</sub>-transformed) lead levels in blood (right).**

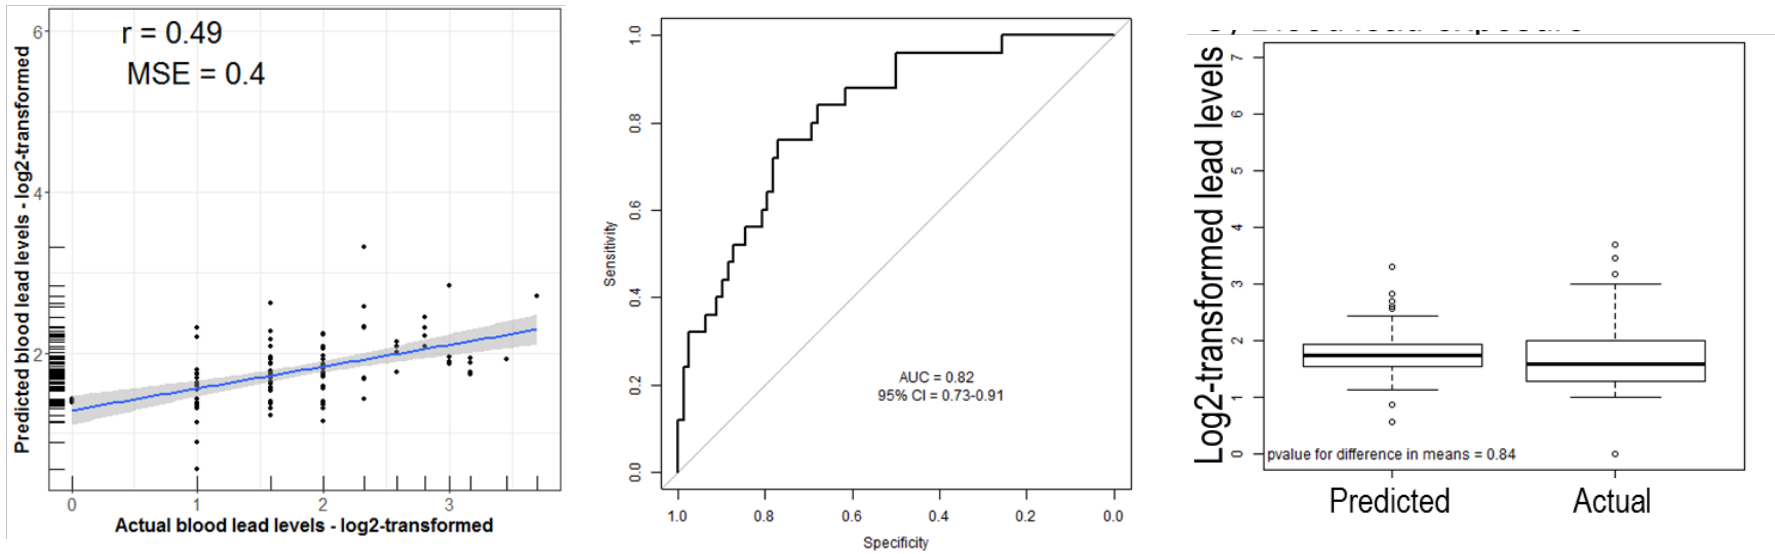

**Figure S5. Empirical distribution function and Kolmogorov-Smirnov test of the actual and predicted lead levels in whole blood.**

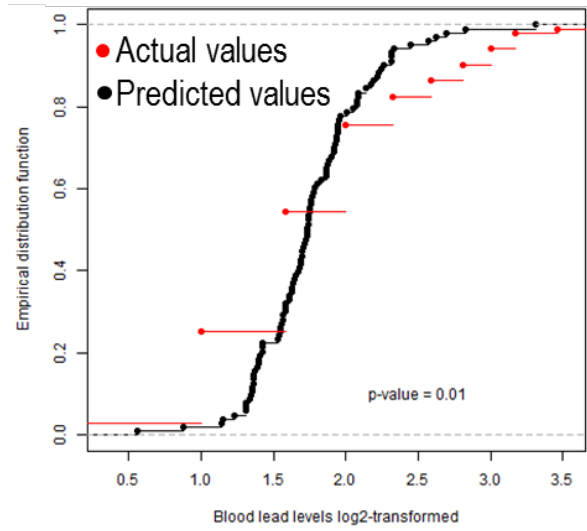



**Figure S6. Distribution of tibia, patella, and blood epigenetic lead biomarkers in their native scale in the Strong Heart Study (n=2,231).**

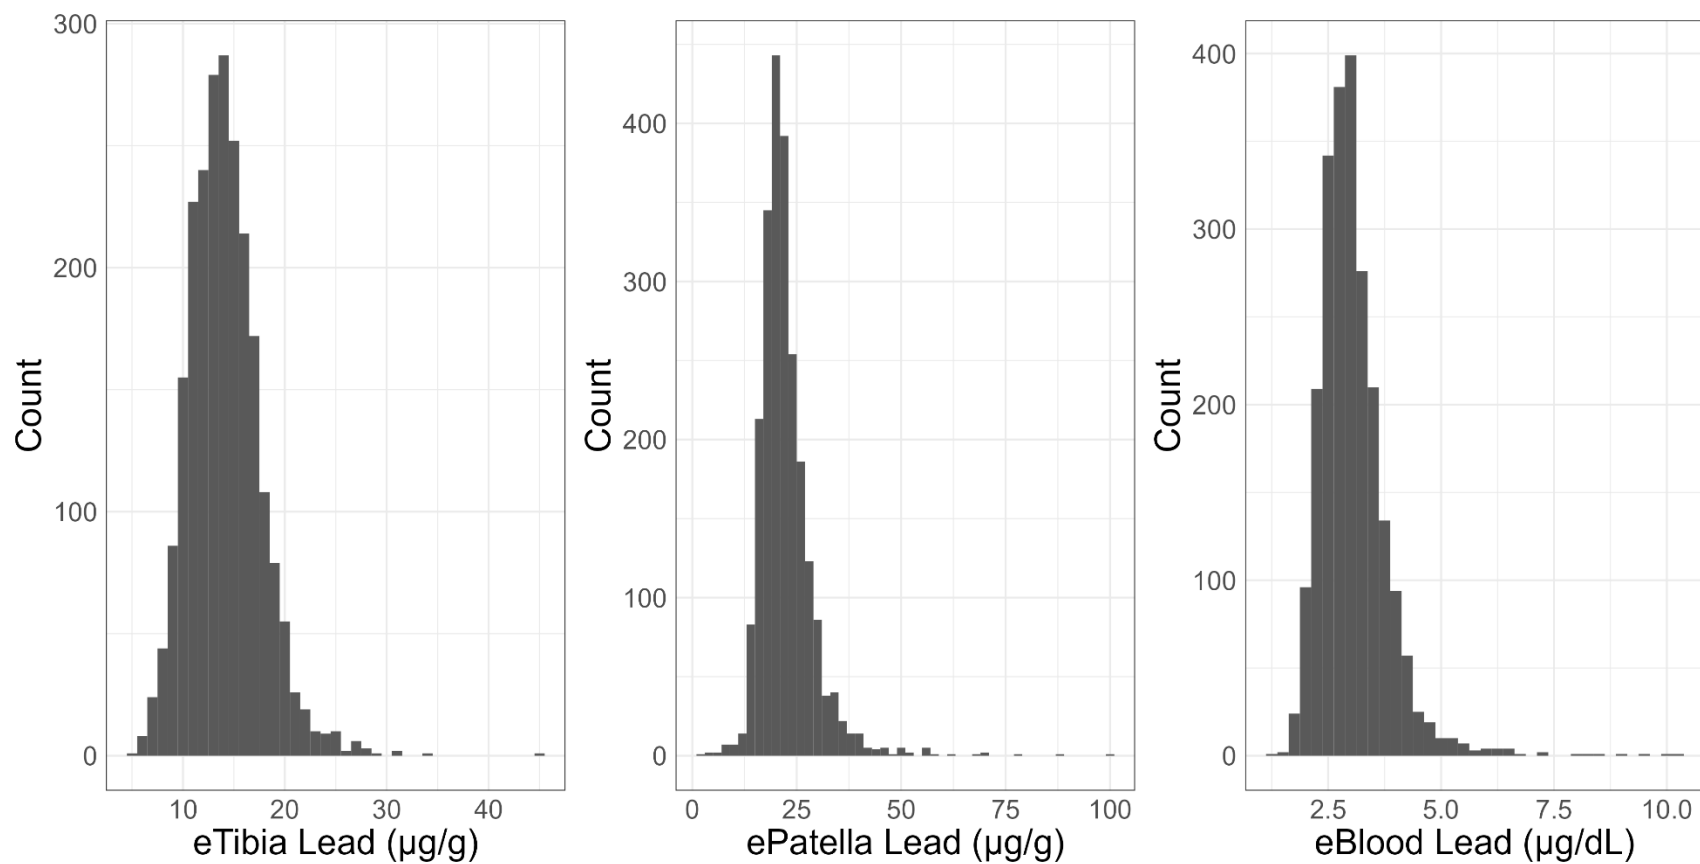

**Figure S7. Associations between lead epigenetic biomarkers (eTibia, ePatella, eBlood) and cardiovascular disease mortality and incidence modeling lead epigenetic biomarkers using restricted quadratic splines (N = 2,321).**

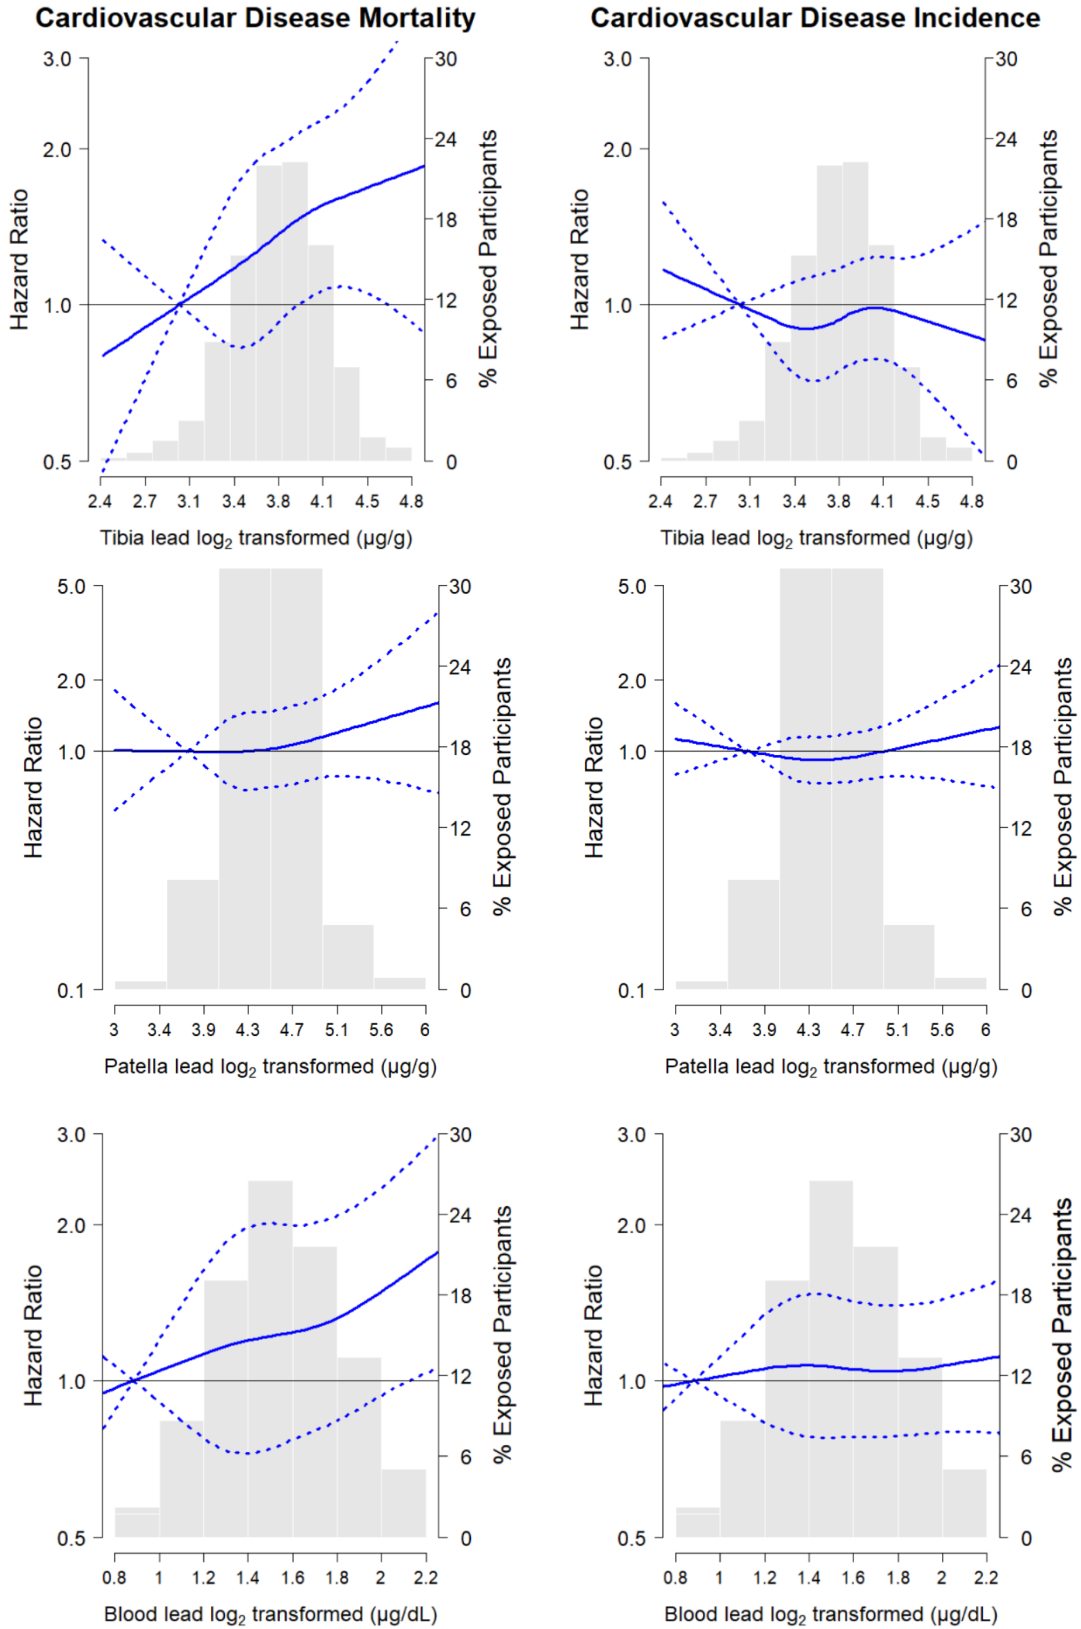

Hazard ratios incorporated restricted quadratic splines for epigenetic lead biomarkers with knots at the 10<sup>th</sup>, 50<sup>th</sup>, and 90<sup>th</sup> percentiles, where the 10<sup>th</sup> percentile was treated as the reference. Solid lines represent adjusted hazard ratios, and dotted lines represent 95% confidence intervals. All models were further adjusted for sex, smoking status (never, former, current), BMI (kg/m<sup>2</sup>), genetic PCs, immune cell types (CD8+, CD4+, NK, B cells, Monocytes), LDL (mg/dL), HDL (mg/dL), diabetes status (yes/no), systolic blood pressure (mmHg), hypertension treatment (yes/no), and eGFR (ml/min/1.73m<sup>2</sup>). All models included center of recruitment as a strata term, and age was accounted for in the follow-up times of all models.
